# Supplementary material
Source: PubMed Central journal article supplement (PMC5915110)
Supplement: 10.1310_sci2402-97.s1.pdf [file 10.1310_sci2402-97.s1.pdf]

**eTable 1.** Odds ratios and confidence intervals of being lost to follow-up – demographic factors: Results from the multivariable model for each post-injury year<sup>a</sup>

|                                 | Post-injury year                     |                                      |                                      |                                      |                                     |                      |                                      |                      |
|---------------------------------|--------------------------------------|--------------------------------------|--------------------------------------|--------------------------------------|-------------------------------------|----------------------|--------------------------------------|----------------------|
|                                 | 1                                    | 5                                    | 10                                   | 15                                   | 20                                  | 25                   | 30                                   | 35                   |
| Age, years                      |                                      |                                      |                                      |                                      |                                     |                      |                                      |                      |
| 0-14                            | <b>1.45</b><br>( <b>1.09, 1.92</b> ) | 0.85<br>(0.57, 1.26)                 | 1.46<br>(0.76, 2.80)                 |                                      |                                     |                      |                                      |                      |
| 15-29                           | 1.03<br>(0.94, 1.12)                 | 0.98<br>(0.90, 1.06)                 | 0.96<br>(0.87, 1.06)                 | 1.15<br>(0.88, 1.50)                 | 1.20<br>(0.71, 2.04)                | 2.88<br>(1.08, 7.69) |                                      |                      |
| 30-44                           |                                      |                                      |                                      | Ref                                  |                                     |                      |                                      |                      |
| 45-59                           | <b>0.81</b><br>( <b>0.73, 0.90</b> ) | <b>0.85</b><br>( <b>0.77, 0.95</b> ) | <u>0.90</u><br>( <u>0.81, 1.00</u> ) | 1.03<br>(0.92, 1.15)                 | <u>1.15</u><br>( <u>1.02, 1.3</u> ) | 1.19<br>(1.03, 1.38) | 0.90<br>(0.61, 1.34)                 | 1.17<br>(0.41, 3.36) |
| 60-74                           | <b>0.67</b><br>( <b>0.58, 0.78</b> ) | <b>0.73</b><br>( <b>0.63, 0.85</b> ) | 0.85<br>(0.72, 1.00)                 | 0.92<br>(0.77, 1.10)                 | 1.10<br>(0.90, 1.35)                | 0.95<br>(0.75, 1.19) | 0.92<br>(0.59, 1.42)                 | 1.11<br>(0.38, 3.25) |
| 75+                             | 0.89<br>(0.69, 1.14)                 | 0.92<br>(0.70, 1.21)                 | 0.85<br>(0.62, 1.15)                 | 0.86<br>(0.60, 1.23)                 | 1.39<br>(0.95, 2.04)                | 0.99<br>(0.67, 1.46) | 1.06<br>(0.6, 1.88)                  | 1.15<br>(0.35, 3.76) |
| Sex                             |                                      |                                      |                                      |                                      |                                     |                      |                                      |                      |
| Female                          | 1.01<br>(0.93, 1.09)                 | 0.96<br>(0.88, 1.05)                 | <u>0.89</u><br>( <u>0.81, 0.99</u> ) | 1.02<br>(0.91, 1.15)                 | 1.02<br>(0.89, 1.18)                | 1.08<br>(0.91, 1.27) | 0.85<br>(0.69, 1.04)                 | 1.04<br>(0.76, 1.42) |
| Male                            |                                      |                                      |                                      | Ref                                  |                                     |                      |                                      |                      |
| Race/Ethnicity                  |                                      |                                      |                                      |                                      |                                     |                      |                                      |                      |
| Non-Hispanic white              |                                      |                                      |                                      | Ref                                  |                                     |                      |                                      |                      |
| Non-Hispanic black              | 1.08<br>(0.99, 1.18)                 | <u>1.12</u><br>( <u>1.02, 1.23</u> ) | 1.10<br>(0.98, 1.23)                 | 1.10<br>(0.96, 1.25)                 | 0.97<br>(0.82, 1.13)                | 0.94<br>(0.77, 1.14) | 1.40<br>(1.07, 1.83)                 | 1.26<br>(0.79, 1.99) |
| Hispanic                        | <b>1.17</b><br>( <b>1.05, 1.31</b> ) | <b>1.25</b><br>( <b>1.11, 1.41</b> ) | 1.11<br>(0.97, 1.28)                 | <b>1.26</b><br>( <b>1.07, 1.50</b> ) | 1.06<br>(0.87, 1.3)                 | 1.07<br>(0.84, 1.36) | <u>1.43</u><br>( <u>1.05, 1.93</u> ) | 1.40<br>(0.83, 2.38) |
| Non-Hispanic others/<br>Unknown | <b>1.35</b><br>( <b>1.16, 1.58</b> ) | 1.20<br>(1.00, 1.43)                 | 1.05<br>(0.84, 1.30)                 | 1.26<br>(0.98, 1.63)                 | 1.36<br>(0.97, 1.88)                | 1.49<br>(1.03, 2.16) | 1.38<br>(0.87, 2.19)                 | 0.99<br>(0.44, 2.19) |

(Continued)

**Table 1.** Odds ratios and confidence intervals of being lost to follow-up – demographic factors: Results from the multivariable model for each post-injury year<sup>a</sup> (CONT.)

|                                  | Post-injury year     |                      |                      |                      |                      |                      |                       |                      |
|----------------------------------|----------------------|----------------------|----------------------|----------------------|----------------------|----------------------|-----------------------|----------------------|
|                                  | 1                    | 5                    | 10                   | 15                   | 20                   | 25                   | 30                    | 35                   |
| Marital status                   |                      |                      |                      |                      |                      |                      |                       |                      |
| Single                           | 1.03<br>(0.94, 1.12) | 1.16<br>(1.04, 1.3)  | 1.13<br>(0.99, 1.29) | 1.11<br>(1.16, 2.83) | 1.23<br>(1.01, 1.49) | 1.12<br>(0.89, 1.41) | 1.29<br>(0.99, 1.69)  | 0.86<br>(0.56, 1.31) |
| Married/Significant other        | Ref                  |                      |                      |                      |                      |                      |                       |                      |
| Divorced/Widowed/<br>Separated   | 1.13<br>(1.02, 1.25) | 1.11<br>(0.98, 1.26) | 1.26<br>(1.11, 1.49) | 1.04<br>(0.86, 1.24) | 1.29<br>(1.04, 1.6)  | 1.18<br>(0.91, 1.53) | 1.07<br>(0.78, 1.45)  | 0.86<br>(0.52, 1.42) |
| Other/Unknown                    | 1.87<br>(1.24, 2.82) | 1.20<br>(1.50, 2.66) | 4.35<br>(2.98, 6.34) | 1.81<br>(1.16, 2.83) | 4.10<br>(2.31, 7.29) | 3.30<br>(1.63, 6.70) | 7.02<br>(2.99, 16.44) | 2.55<br>(0.75, 8.64) |
| Place of residence               | Ref                  |                      |                      |                      |                      |                      |                       |                      |
| Private                          | Ref                  |                      |                      |                      |                      |                      |                       |                      |
| Institution/Group living         | 1.39<br>(1.25, 1.55) | 1.14<br>(0.92, 1.42) | 1.06<br>(0.77, 1.47) | 0.88<br>(0.57, 1.37) | 1.06<br>(0.64, 1.77) | 0.91<br>(0.45, 1.85) | 1.08<br>(0.45, 2.6)   | 1.32<br>(0.25, 7.04) |
| Other/Unknown                    | 1.79<br>(1.27, 2.52) | 1.28<br>(1.02, 1.60) | 0.98<br>(0.72, 1.33) | 1.74<br>(1.21, 2.49) | 1.06<br>(0.67, 1.67) | 0.75<br>(0.41, 1.39) | 1.14<br>(0.59, 2.21)  | 2.05<br>(0.75, 5.62) |
| Education                        | Ref                  |                      |                      |                      |                      |                      |                       |                      |
| Less than high school            | Ref                  |                      |                      |                      |                      |                      |                       |                      |
| High school                      | 0.92<br>(0.86, 0.99) | 0.79<br>(0.72, 0.87) | 0.95<br>(0.83, 1.08) | 0.82<br>(0.70, 0.96) | 1.00<br>(0.83, 1.23) | 0.94<br>(0.74, 1.2)  | 0.79<br>(0.58, 1.08)  | 0.92<br>(0.53, 1.58) |
| College or higher                | 0.78<br>(0.70, 0.88) | 0.62<br>(0.54, 0.71) | 0.69<br>(0.58, 0.81) | 0.83<br>(0.68, 1.02) | 1.01<br>(0.79, 1.29) | 0.97<br>(0.73, 1.30) | 0.78<br>(0.55, 1.11)  | 0.62<br>(0.34, 1.16) |
| Unknown                          | 1.43<br>(1.23, 1.67) | 1.74<br>(1.29, 2.34) | 1.21<br>(0.80, 1.84) | 1.71<br>(1.09, 2.69) | 1.38<br>(0.72, 2.66) | 0.91<br>(0.38, 2.18) | 1.67<br>(0.62, 4.53)  | 1.78<br>(0.44, 7.27) |
| Employment status                | Ref                  |                      |                      |                      |                      |                      |                       |                      |
| Employed                         | Ref                  |                      |                      |                      |                      |                      |                       |                      |
| Student or trainee               | 0.93<br>(0.84, 1.03) | 1.16<br>(0.99, 1.37) | 1.01<br>(0.84, 1.21) | 0.94<br>(0.75, 1.19) | 1.08<br>(0.83, 1.4)  | 1.14<br>(0.83, 1.58) | 1.17<br>(0.8, 1.71)   | 1.41<br>(0.75, 2.68) |
| Unemployed/Retired/<br>Homemaker | 1.10<br>(1.02, 1.20) | 1.27<br>(1.12, 1.45) | 0.88<br>(0.76, 1.02) | 1.08<br>(0.9, 1.28)  | 1.04<br>(0.85, 1.27) | 1.00<br>(0.78, 1.27) | 0.85<br>(0.64, 1.12)  | 1.30<br>(0.84, 2.02) |
| Unknown                          | 1.10<br>(0.89, 1.36) | 1.04<br>(0.86, 1.26) | 0.82<br>(0.64, 1.05) | 1.19<br>(0.88, 1.59) | 0.91<br>(0.63, 1.32) | 1.54<br>(1.00, 2.37) | 0.69<br>(0.40, 1.19)  | 1.99<br>(0.91, 4.33) |

(Continued)

**eTable 1.** Odds ratios and confidence intervals of being lost to follow-up – demographic factors: Results from the multivariable model for each post-injury year<sup>a</sup> (CONT.)

| Primary payer                      | Post-injury year                     |                                      |                                      |                                      |                                      |                      |                                      |                      |  |  |
|------------------------------------|--------------------------------------|--------------------------------------|--------------------------------------|--------------------------------------|--------------------------------------|----------------------|--------------------------------------|----------------------|--|--|
|                                    | 1                                    | 5                                    | 10                                   | 15                                   | 20                                   | 25                   | 30                                   | 35                   |  |  |
| Private insurance                  |                                      |                                      |                                      |                                      |                                      |                      |                                      |                      |  |  |
| Medicare/Medicaid/Gov/<br>Veterans | <b>1.23</b><br>(1.11, 1.35)          | 0.91<br>(0.81, 1.03)                 | 1.01<br>(0.87, 1.17)                 | 0.90<br>(0.75, 1.08)                 | 0.89<br>(0.72, 1.11)                 | 0.85<br>(0.65, 1.12) | 0.73<br>(0.52, 1.03)                 | 0.67<br>(0.36, 1.22) |  |  |
| Workers' compensation              | <b>0.75</b><br>( <b>0.63, 0.91</b> ) | <b>0.88</b><br>( <b>0.71, 1.09</b> ) | 0.82<br>(0.63, 1.08)                 | <b>0.53</b><br>( <b>0.37, 0.76</b> ) | 0.75<br>(0.50, 1.11)                 | 0.61<br>(0.36, 1.04) | 0.65<br>(0.34, 1.25)                 | 0.26<br>(0.07, 0.98) |  |  |
| Other/Private funds                | <b>1.44</b><br>( <b>1.22, 1.69</b> ) | 1.27<br>(1.01, 1.61)                 | <b>1.54</b><br>( <b>1.15, 2.05</b> ) | <b>1.92</b><br>( <b>1.36, 2.71</b> ) | 1.61<br>(1.05, 2.47)                 | 1.13<br>(0.65, 1.98) | <b>1.92</b><br>( <b>1.09, 3.38</b> ) | 1.39<br>(0.40, 4.86) |  |  |
| Unknown                            | 0.95<br>(0.86, 1.06)                 | <b>1.22</b><br>( <b>1.08, 1.37</b> ) | <b>1.36</b><br>( <b>1.17, 1.59</b> ) | 1.23<br>(1.03, 1.47)                 | <b>1.38</b><br>( <b>1.12, 1.70</b> ) | 1.25<br>(0.98, 1.61) | 1.04<br>(0.77, 1.42)                 | 0.87<br>(0.53, 1.42) |  |  |

Note: Odds ratios >1 indicate more likely to be lost to follow-up. Odds ratios with underline indicate .01 ≤ p < .05; bold font indicates p < .01. Gov = government.  
<sup>a</sup>Controlling for Spinal Cord Injury Model Systems centers, listed variables, and injury factors.
