# Supplementary material
Source: PubMed Central journal article supplement (PMC5915110)
Supplement: 10.1310_sci2402-97.s2.pdf [file 10.1310_sci2402-97.s2.pdf]

**eTable 2.** Odds ratios and confidence intervals of being lost to follow-up – injury factors: Results from the multivariable model for each post-injury year<sup>a</sup>

|                       |                      | Post-injury year            |                             |                             |                             |                             |                             |                             |                       |
|-----------------------|----------------------|-----------------------------|-----------------------------|-----------------------------|-----------------------------|-----------------------------|-----------------------------|-----------------------------|-----------------------|
|                       |                      | 1                           | 5                           | 10                          | 15                          | 20                          | 25                          | 30                          | 35                    |
| Injury cohort         | 1972-1985            | <b>2.30</b><br>(2.08, 2.55) | <b>2.11</b><br>(1.90, 2.35) | <b>2.23</b><br>(1.91, 2.61) | 0.88<br>(0.05, 14.93)       | <b>1.56</b><br>(1.37, 1.77) | <b>1.40</b><br>(1.16, 1.69) |                             |                       |
|                       | 1986-2000            | <b>1.33</b><br>(1.21, 1.47) | <b>1.64</b><br>(1.48, 1.82) | <b>1.83</b><br>(1.57, 2.13) | 0.49<br>(0.03, 8.38)        | Ref                         | Ref                         |                             |                       |
|                       | 2001-2013            | Ref                         | Ref                         | Ref                         | Ref                         | Ref                         | Ref                         |                             |                       |
| Etiology              | Vehicular            |                             |                             |                             |                             | Ref                         |                             |                             |                       |
|                       | Violence             | <b>1.12</b><br>(1.02, 1.23) | 1.09<br>(0.99, 1.21)        | 1.09<br>(0.97, 1.23)        | 1.07<br>(0.93, 1.23)        | 1.05<br>(0.89, 1.24)        | 1.14<br>(0.93, 1.39)        | 0.92<br>(0.70, 1.20)        | 0.79<br>(0.51, 1.25)  |
|                       | Sports               | 0.95<br>(0.85, 1.06)        | 0.93<br>(0.83, 1.04)        | 0.91<br>(0.80, 1.04)        | 0.90<br>(0.78, 1.05)        | 0.93<br>(0.79, 1.10)        | 0.98<br>(0.80, 1.18)        | 0.90<br>(0.72, 1.13)        | 1.03<br>(0.71, 1.49)  |
|                       | Falls                | 1.02<br>(0.93, 1.11)        | 1.11<br>(1.00, 1.22)        | <b>1.14</b><br>(1.02, 1.28) | 1.04<br>(0.91, 1.2)         | 1.03<br>(0.88, 1.22)        | 0.97<br>(0.80, 1.19)        | 1.00<br>(0.78, 1.28)        | 1.14<br>(0.77, 1.71)  |
|                       | Other/Unknown        | 1.07<br>(0.95, 1.21)        | 1.13<br>(1.00, 1.29)        | 1.00<br>(0.86, 1.17)        | 1.04<br>(0.86, 1.24)        | 0.98<br>(0.79, 1.21)        | 0.95<br>(0.73, 1.24)        | 0.87<br>(0.63, 1.19)        | 1.40<br>(0.84, 2.35)  |
| Neurological category | Ventilator dependent | 0.74<br>(0.58, 0.94)        | <b>0.75</b><br>(0.59, 0.97) | 0.81<br>(0.60, 1.10)        | <b>0.50</b><br>(0.33, 0.75) | 0.69<br>(0.39, 1.21)        | 0.48<br>(0.24, 0.94)        | 0.65<br>(0.26, 1.67)        | 2.77<br>(0.38, 20.36) |
|                       | C1-C4 AIS ABC        | 0.86<br>(0.76, 0.97)        | <b>0.62</b><br>(0.54, 0.71) | <b>0.75</b><br>(0.64, 0.87) | <b>0.63</b><br>(0.52, 0.76) | <b>0.73</b><br>(0.58, 0.91) | <b>0.58</b><br>(0.45, 0.76) | <b>0.54</b><br>(0.39, 0.76) | 0.72<br>(0.40, 1.27)  |
|                       | C5-C8 AIS ABC        | <b>0.89</b><br>(0.80, 0.98) | <b>0.69</b><br>(0.63, 0.77) | <b>0.67</b><br>(0.60, 0.76) | <b>0.75</b><br>(0.65, 0.86) | <b>0.69</b><br>(0.59, 0.81) | <b>0.58</b><br>(0.48, 0.69) | <b>0.72</b><br>(0.57, 0.90) | 0.94<br>(0.66, 1.34)  |
|                       | T1-S3 AIS ABC        | 0.98<br>(0.89, 1.07)        | <b>0.77</b><br>(0.70, 0.84) | <b>0.79</b><br>(0.71, 0.87) | 0.90<br>(0.79, 1.01)        | <b>0.82</b><br>(0.71, 0.94) | <b>0.66</b><br>(0.56, 0.77) | <b>0.75</b><br>(0.62, 0.92) | 0.91<br>(0.67, 1.26)  |
|                       | AIS D                |                             |                             |                             |                             | Ref                         |                             |                             |                       |
|                       | Unknown              | 1.04<br>(0.89, 1.21)        | 0.86<br>(0.72, 1.02)        | 0.96<br>(0.77, 1.20)        | 1.21<br>(0.91, 1.62)        | 0.77<br>(0.54, 1.11)        | 0.60<br>(0.36, 0.87)        | 1.17<br>(0.68, 2.00)        | 1.44<br>(0.37, 5.65)  |

(Continued)

**eTable 2.** Odds ratios and confidence intervals of being lost to follow-up – injury factors: Results from the multivariable model for each post-injury year<sup>a</sup> (CONT.)

| Bladder management | Catheter-free/Normal | Post-injury year                    |                                     |                                     |                      |                       |                      |                                    |
|--------------------|----------------------|-------------------------------------|-------------------------------------|-------------------------------------|----------------------|-----------------------|----------------------|------------------------------------|
|                    |                      | 1                                   | 5                                   | 10                                  | 15                   | 20                    | 25                   | 30                                 |
| ICP                | 0.90<br>(0.83, 0.98) | 0.99<br>(0.89, 1.10)                | <b>0.82</b><br>(0.71, <b>0.93</b> ) | 0.86<br>(0.73, 1.02)                | 0.93<br>(0.76, 1.13) | 1.01<br>(0.79, 1.29)  | 0.89<br>(0.66, 1.21) | 0.82<br>(0.49, 1.36)               |
| Indwelling         | 0.94<br>(0.85, 1.04) | <u>0.87</u><br>(0.78, <u>0.98</u> ) | 0.88<br>(0.76, 1.01)                | 1.07<br>(0.90, 1.26)                | 0.85<br>(0.70, 1.05) | 1.00<br>(0.800, 1.27) | 0.87<br>(0.66, 1.15) | <u>0.57</u><br>(0.36, <u>0.9</u> ) |
| Other/Unknown      | 1.03<br>(0.86, 1.22) | 1.12<br>(0.94, 1.34)                | 1.20<br>(0.97, 1.49)                | <b>1.43</b><br>(1.10, <b>1.85</b> ) | 1.35<br>(0.98, 1.86) | 1.46<br>(0.93, 2.23)  | 0.76<br>(0.44, 1.32) | 0.54<br>(0.25, 1.20)               |

Note: Odds ratios >1 indicate more likely to be lost to follow-up. Odds ratios with underline indicate .01 ≤ p < .05; bold font indicates p < .01.

AIS = American Spinal Injury Association Impairment Scale; C = cervical; Gov = government; ICP = intermittent catheterization program; T = thoracic; S = sacral.

<sup>a</sup>Controlling for Spinal Cord Injury Model Systems centers, listed variables, and demographic factors.
